# Supplementary material
Source: PubMed Central journal article supplement (PMC8229828)
Supplement: sj-pdf-1-vdi-10.1177_10406387211021599.pdf [file sj-pdf-1-vdi-10.1177_10406387211021599.pdf]

**Supplementary Table 1.** Samples tested by ELISA for antibodies against *Salmonella* and hepatitis E virus (HEV).

| Farm | 1st sampling (3-mo-old pigs)                 |                    |                                              |                    | 2nd sampling (6-mo-old pigs)                 |                    |                                              |                    |
|------|----------------------------------------------|--------------------|----------------------------------------------|--------------------|----------------------------------------------|--------------------|----------------------------------------------|--------------------|
|      | IgG anti- <i>Salmonella</i>                  |                    | IgG anti-HEV                                 |                    | IgG anti- <i>Salmonella</i>                  |                    | IgG anti-HEV                                 |                    |
|      | Serum                                        | Oral fluid         | Serum                                        | Oral fluid         | Serum                                        | Oral fluid         | Serum                                        | Oral fluid         |
|      | Pos. pigs/no. pigs<br>No. pos. pens/no. pens | Pos. pens/no. pens | Pos. pigs/no. pigs<br>No. pos. pens/no. pens | Pos. pens/no. pens | Pos. pigs/no. pigs<br>No. pos. pens/no. pens | Pos. pens/no. pens | Pos. pigs/no. pigs<br>No. pos. pens/no. pens | Pos. pens/no. pens |
| 1    | 6/70 (8.6)<br>3/6 (50)                       | 0/6 (0)            | 0/70 (0)<br>0/6 (0)                          | 5/6 (83.3)         | 13/70 (18.6)<br>5/6 (83.3)                   | 0/6 (0)            | 0/70 (0)<br>0/6 (0)                          | 6/6 (100)          |
| 2    | 0/49 (0)<br>0/5 (0)                          | 0/5 (0)            | 2/49 (4)<br>2/5 (40)                         | 0/5 (0)            | 3/50 (6)<br>3/5 (60)                         | 0/5 (0)            | 45/50 (90)<br>5/5 (100)                      | 0/5 (0)            |
| 3    | 1/76 (1.3)<br>1/6 (16.7)                     | 0/6 (0)            | 10/76 (12.6)<br>4/6 (66.7)                   | 2/6 (33.3)         | 1/76 (1.3)<br>1/12 (8.3)                     | 0/12 (0)           | 38/76 (50)<br>9/12 (75)                      | 0/12 (0)           |
| 4    | 1/55 (1.8)<br>1/2 (50)                       | 0/2 (0)            | 2/55 (3.6)<br>2/2 (100)                      | 2/2 (100)          | 2/55 (3.6)<br>1/3 (33.3)                     | 0/3 (0)            | 31/55 (56.4)<br>3/3 (100)                    | 0/3 (0)            |
| 5    | 0/10 (0)<br>0/1 (0)                          | 0/1 (0)            | 1/10 (10)<br>1/1 (100)                       | 0/1 (0)            | 0/9 (0)<br>0/1 (0)                           | 0/1 (0)            | 0/9 (0)<br>0/1 (0)                           | 0/1 (0)            |
| 6    | 0/40 (0)<br>0/1 (0)                          | 0/1 (0)            | 1/40 (2.5)<br>1/1 (100)                      | 1/1 (100)          | 0/38 (0)<br>0/1 (0)                          | NA                 | 28/38 (73.7)<br>1/1 (100)                    | NA                 |
| 7    | 4/87 (4.5)<br>3/3 (100)                      | 0/3 (0)            | 0/87 (0)<br>0/3 (0)                          | 0/3 (0)            | 26/82 (31.7)<br>4/4 (100)                    | 0/4 (0)            | 10/82 (12.2)<br>3/4 (75)                     | 0/4 (0)            |
| 8    | 0/73 (0)<br>0/4 (0)                          | 0/4 (0)            | 1/73 (1.3)<br>1/4 (25)                       | 0/4 (0)            | NA                                           | NA                 | NA                                           | NA                 |
| 9    | 3/36 (8.3)<br>1/1 (100)                      | 0/1 (0)            | 6/36 (16.6)<br>1/1 (100)                     | 0/1 (0)            | 7/36 (19.4)<br>2/2 (100)                     | 0/2 (0)            | 21/36 (58.3)<br>2/2 (100)                    | 0/2 (0)            |
| 10   | 0/20 (0)<br>0/2 (0)                          | 0/2 (0)            | 0/20 (0)<br>0/2 (0)                          | 0/2 (0)            | 1/20 (5)<br>1/2 (50)                         | 0/2 (0)            | 0/20 (0)<br>0/2 (0)                          | 0/2 (0)            |
| 11   | 0/87 (0)<br>0/5 (0)                          | 0/5 (0)            | 0/87 (0)<br>0/5 (0)                          | 0/5 (0)            | 0/80 (0)<br>0/6 (0)                          | 0/6 (0)            | 65/80 (81.3)<br>6/6 (100)                    | 0/6 (0)            |
| 12   | 0/55 (0)<br>0/6 (0)                          | 0/6 (0)            | 0/55 (0)<br>0/6 (0)                          | 0/6 (0)            | 1/51 (2)<br>1/6 (16.7)                       | 0/6 (0)            | 0/51 (0)<br>0/6 (0)                          | 6/6 (100)          |

Suitability of oral fluids for pig herd monitoring

|     |                                          |          |                                          |          |                                          |          |                                             |                     |
|-----|------------------------------------------|----------|------------------------------------------|----------|------------------------------------------|----------|---------------------------------------------|---------------------|
| 13  | 0/101 (0)<br>0/8 (0)                     | 0/8 (0)  | 0/101 (0)<br>0/8 (0)                     | 0/8 (0)  | <b>23/97 (23.7)</b><br><b>7/7 (100)</b>  | 0/7 (0)  | <b>54/97 (55.7)</b><br><b>7/7 (100)</b>     | <b>2/7 (28.6)</b>   |
| 14  | <b>7/56 (12.5)</b><br><b>3/3 (100)</b>   | 0/3 (0)  | 0/56 (0)<br>0/3 (0)                      | 0/3 (0)  | NA                                       | NA       | NA                                          | NA                  |
| 15  | <b>1/92 (1.1)</b><br><b>1/5 (20)</b>     | 0/5 (0)  | 0/92 (0)<br>0/5 (0)                      | 0/5 (0)  | <b>7/79 (8.9)</b><br><b>4/7 (57.1)</b>   | 0/7 (0)  | 0/79 (0)<br>0/7 (0)                         | 0/7 (0)             |
| 16  | <b>3/68 (4.4)</b><br><b>2/2 (100)</b>    | 0/2 (0)  | <b>10/68 (14.7)</b><br><b>2/2 (100)</b>  | 0/2 (0)  | <b>12/67 (17.9)</b><br><b>2/2 (100)</b>  | 0/2 (0)  | <b>38/67 (56.7)</b><br><b>2/2 (100)</b>     | 0/2 (0)             |
| 17  | <b>2/25 (8.0)</b><br><b>1/1 (100)</b>    | 0/1 (0)  | 0/25 (0)<br>0/1 (0)                      | 0/1 (0)  | <b>5/18 (27.8)</b><br><b>3/3 (100)</b>   | 0/3 (0)  | <b>16/18 (88.9)</b><br><b>3/3 (100)</b>     | <b>2/3 (66.7)</b>   |
| 18° | <b>5/119 (4.2)</b><br><b>4/27 (14.8)</b> | 0/27 (0) | <b>7/119 (5.8)</b><br><b>5/27 (18.5)</b> | 0/27 (0) | <b>3/119 (2.5)</b><br><b>3/27 (11.1)</b> | 0/27 (0) | <b>92/119 (77.3)</b><br><b>26/27 (96.2)</b> | <b>25/27 (92.6)</b> |
| 19  | <b>23/47 (48.9)</b><br><b>2/2 (100)</b>  | 0/2 (0)  | <b>2/47 (4.2)</b><br><b>1/2 (50)</b>     | 0/2 (0)  | NA                                       | NA       | NA                                          | NA                  |
| 20  | <b>3/76 (3.9)</b><br><b>2/4 (50)</b>     | 0/4 (0)  | 0/76 (0)<br>0/4 (0)                      | 0/4 (0)  | <b>18/66 (27.3)</b><br><b>5/5 (100)</b>  | 0/5 (0)  | <b>64/66 (97.0)</b><br><b>5/5 (100)</b>     | <b>5/5 (100)</b>    |
| 21  | 0/40 (0)<br>0/4 (0)                      | 0/4 (0)  | 0/40 (0)<br>0/4 (0)                      | 0/4 (0)  | <b>1/40 (2.5)</b><br><b>1/4 (25)</b>     | 0/4 (0)  | <b>25/40 (62.5)</b><br><b>4/4 (100)</b>     | <b>4/4 (100)</b>    |
| 22  | 0/78(0)<br>0/4 (0)                       | 0/4 (0)  | 0/78 (0)<br>0/4 (0)                      | 0/4 (0)  | <b>8/72 (11.1)</b><br><b>4/4 (100)</b>   | 0/4 (0)  | <b>66/72 (91.7)</b><br><b>4/4 (100)</b>     | <b>4/4 (100)</b>    |
| 23  | 0/49 (0)<br>0/2 (0)                      | 0/2 (0)  | 0/49 (0)<br>0/2 (0)                      | 0/2 (0)  | <b>9/48 (18.8)</b><br><b>2/2 (100)</b>   | 0/2 (0)  | <b>47/48 (97.9)</b><br><b>2/2 (100)</b>     | <b>2/2 (100)</b>    |

NA = not assessed. Positive samples are marked in boldface; prevalence (%) is in parentheses.

**Supplementary Table 2.** Samples from pigs at 3 and 6 mo old tested by culture for methicillin-resistant *Staphylococcus aureus* (MRSA) and *Yersinia enterocolitica*.

| Farm | 1st sampling (3-mo-old pigs)                     |                        |                                |                        | 2nd sampling (6-mo-old pigs)                     |                        |                                |                        |
|------|--------------------------------------------------|------------------------|--------------------------------|------------------------|--------------------------------------------------|------------------------|--------------------------------|------------------------|
|      | MRSA                                             |                        | <i>Yersinia enterocolitica</i> |                        | MRSA                                             |                        | <i>Yersinia enterocolitica</i> |                        |
|      | Nasal swab                                       | Oral fluid             | Pen-based fecal samples        | Oral fluid             | Nasal swab                                       | Oral fluid             | Pen floor fecal samples        | Oral fluid             |
|      | No. pos. pigs/no. pigs<br>No. pos. pens/no. pens | No. pos. pens/no. pens | No. pos. pens/no. pens         | No. pos. pens/no. pens | No. pos. pigs/no. pigs<br>No. pos. pens/no. pens | No. pos. pens/no. pens | No. pos pens/no. pens          | No. pos. pens/no. pens |
| 1    | 7/35 (20)<br>4/6 (67)                            | 0/6 (0)                | 2/6 (33.3)                     | 1/6 (16.7)             | 0/35 (0)<br>0/6 (0)                              | 0/6 (0)                | 6/6 (100)                      | 0/6 (0)                |
| 2    | 0/25 (0)<br>0/5 (0)                              | 0/5 (0)                | 2/5 (40)                       | 1/5 (20)               | 0/26 (0)<br>0/5 (0)                              | 0/5 (0)                | 1/5 (20)                       | 2/5 (40)               |
| 3    | 0/27 (0)<br>0/6 (0)                              | 0/6 (0)                | 0/6 (0)                        | 0/6 (0)                | 0/25 (0)<br>0/12 (0)                             | 0/12 (0)               | 0/12 (0)                       | 0/12 (0)               |
| 4    | 0/28 (0)<br>0/2 (0)                              | 0/2 (0)                | 0/2 (0)                        | 0/2 (0)                | 0/28 (0)<br>0/3 (0)                              | 1/3 (0)                | 3/3 (100)                      | 1/3 (33.3)             |
| 5    | 0/10 (0)<br>0/1 (0)                              | 0/1 (0)                | 0/1 (0)                        | 0/1 (0)                | 0/9 (0)<br>0/1 (0)                               | 0/1 (0)                | 0/1 (0)                        | 0/1 (0)                |
| 6    | 13/21 (62)<br>1/1 (100)                          | 1/1 (100)              | 0/1 (0)                        | 0/1 (0)                | 19/20 (95)<br>1/1 (100)                          | 1/1 (100)              | 1/1 (100)                      | 1/1 (100)              |
| 7    | 0/30 (0)<br>0/3 (0)                              | 0/3 (0)                | 2/3 (66.7)                     | 0/3 (0)                | 1/28 (4)<br>1/4 (25)                             | 0/4 (0)                | 2/4 (50)                       | 4/4 (100)              |
| 8    | 1/25 (4)<br>1/4 (25)                             | 0/4 (0)                | 1/4 (25)                       | 0/4 (0)                | NA                                               | NA                     | NA                             | NA                     |
| 9    | NA                                               | NA                     | 0/1 (0)                        | 0/1 (0)                | 21/22 (96)<br>2/2 (100)                          | 2/2 (100)              | 1/2 (50)                       | 1/2 (50)               |
| 10   | 20/20 (100)<br>2/2 (100)                         | 2/2 (100)              | 0/2 (0)                        | 2/2 (100)              | 20/20 (100)<br>2/2 (100)                         | 2/2 (100)              | NA                             | 0/2 (0)                |
| 11   | 0/29 (0)<br>0/5 (0)                              | 0/5 (0)                | 0/5 (0)                        | 2/5 (40)               | 0/26 (0)<br>0/6 (0)                              | 0/6 (0)                | 0/6 (0)                        | 1/6 (16.7)             |
| 12   | 0/28 (0)<br>0/6 (0)                              | 0/6 (0)                | 1/6 (16.7)                     | 2/6 (33.3)             | 0/27 (0)<br>0/6 (0)                              | 0/6 (0)                | 2/6 (33.3)                     | 0/6 (0)                |
| 13   | 0/27 (0)<br>0/8 (0)                              | 1/8 (25)               | 7/8 (87.5)                     | 1/8 (25)               | 0/29 (0)<br>0/7 (0)                              | 2/7 (28.6)             | 2/7 (28.6)                     | 0/7 (0)                |
| 14   | 0/19 (0)<br>0/3 (0)                              | 0/3 (0)                | 1/3 (33.3)                     | 2/3 (66.7)             | NA                                               | NA                     | NA                             | NA                     |
| 15   | 0/27 (0)<br>0/5 (0)                              | 0/5 (0)                | 1/5 (20)                       | 2/5 (40)               | 0/21 (0)<br>0/7 (0)                              | 0/7 (0)                | 2/7 (28.6)                     | 1/7 (14.3)             |
| 16   | 0/24 (0)<br>0/2 (0)                              | 0/2 (0)                | 1/2 (50)                       | 2/2 (100)              | 0/24 (0)<br>0/2 (0)                              | 0/2 (0)                | 0/2 (0)                        | 0/2 (0)                |

Suitability of oral fluids for pig herd monitoring

|     |                                        |                  |                    |                    |                                       |                 |                    |                   |
|-----|----------------------------------------|------------------|--------------------|--------------------|---------------------------------------|-----------------|--------------------|-------------------|
| 17  | 0/17 (0)<br>0/1 (0)                    | 0/1 (0)          | 0/1 (0)            | <b>1/1 (100)</b>   | 0/11 (0)<br>0/3 (0)                   | 0/3 (0)         | 0/3 (0)            | 0/3 (0)           |
| 18° | 0/40 (0)<br>0/27 (0)                   | 0/27 (0)         | <b>3/27 (11.1)</b> | <b>9/27 (33.3)</b> | 0/40 (0)<br>0/27 (0)                  | 0/27 (0)        | <b>6/27 (22.2)</b> | <b>1/27 (3.7)</b> |
| 19  | 0/21 (0)<br>0/2 (0)                    | 0/2 (0)          | <b>2/2 (100)</b>   | NA                 | NA                                    | NA              | NA                 | NA                |
| 20  | <b>1/25 (4)</b><br><b>1/4 (25)</b>     | 0/4 (0)          | 0/4 (0)            | 0/4 (0)            | 0/23 (0)<br>0/5 (0)                   | 0/5 (0)         | 0/5 (0)            | 0/5 (0)           |
| 21  | 0/20 (0)<br>0/4 (0)                    | 0/4 (0)          | <b>3/4 (75)</b>    | 0/4 (0)            | 0/21 (0)<br>0/4 (0)                   | 0/4 (0)         | 0/4 (0)            | 0/4 (0)           |
| 22  | 0/26 (0)<br>0/4 (0)                    | 0/4 (0)          | <b>4/4 (100)</b>   | <b>2/4 (50)</b>    | 0/25 (0)<br>0/4 (0)                   | 0/4 (0)         | 0/4 (0)            | 0/4 (0)           |
| 23  | NA                                     | NA               | <b>1/2 (50)</b>    | 0/2 (0)            | 0/24 (0)<br>0/4 (0)                   | 0/4 (0)         | 0/4 (0)            | 0/4 (0)           |
| 24  | 0/28 (0)<br>0/4 (0)                    | 0/4 (0)          | NA                 | NA                 | 0/24 (0)<br>0/4 (0)                   | 0/4 (0)         | NA                 | NA                |
| 25  | 0/29 (0)<br>0/3 (0)                    | 0/3 (0)          | NA                 | NA                 | 0/29 (0)<br>0/3 (0)                   | 0/3 (0)         | NA                 | NA                |
| 26  | 0/26 (0)<br>0/3 (0)                    | 0/3 (0)          | NA                 | NA                 | 0/26 (0)<br>0/3 (0)                   | 0/3 (0)         | NA                 | NA                |
| 27  | 0/39 (0)<br>0/1 (0)                    | 0/1 (0)          | NA                 | NA                 | 0/39 (0)<br>0/1 (0)                   | 0/1 (0)         | NA                 | NA                |
| 28  | 0/25 (0)<br>0/1 (0)                    | 0/1 (0)          | NA                 | NA                 | 0/25 (0)<br>0/6 (0)                   | 0/6 (0)         | NA                 | NA                |
| 29  | 0/30 (0)<br>0/1 (0)                    | 0/1 (0)          | NA                 | NA                 | 0/30 (0)<br>0/2 (0)                   | 0/2 (0)         | NA                 | NA                |
| 30  | 0/27 (0)<br>0/2 (0)                    | 0/2 (0)          | NA                 | NA                 | 0/21 (0)<br>0/2 (0)                   | 0/2 (0)         | NA                 | NA                |
| 31  | 0/30 (0)<br>0/2 (0)                    | 0/2 (0)          | NA                 | NA                 | 0/22 (0)<br>0/2 (0)                   | 0/2 (0)         | NA                 | NA                |
| 32  | <b>29/30 (97)</b><br><b>1/1 (100)</b>  | 0/1 (0)          | NA                 | NA                 | <b>27/27 (100)</b><br><b>1/2 (50)</b> | 0/2 (0)         | NA                 | NA                |
| 33  | <b>30/30 (100)</b><br><b>1/1 (100)</b> | <b>1/1 (100)</b> | NA                 | NA                 | <b>21/29 (72)</b><br><b>1/2 (50)</b>  | <b>1/2 (50)</b> | NA                 | NA                |

NA = not assessed. Positive samples are marked in boldface; prevalence (%) is in parentheses.
